# Supplementary material
Source: PubMed Central journal article supplement (PMC4207341)
Supplement: npp2014114x2.pdf [file npp2014114x2.pdf]

- Parent Study 1: Early Brain Development in Children of Women with Depressive Disorders
- Parent Study 2: Early Brain Development in High Risk Children
- Parent Study 3: Early Brain Development in Twins

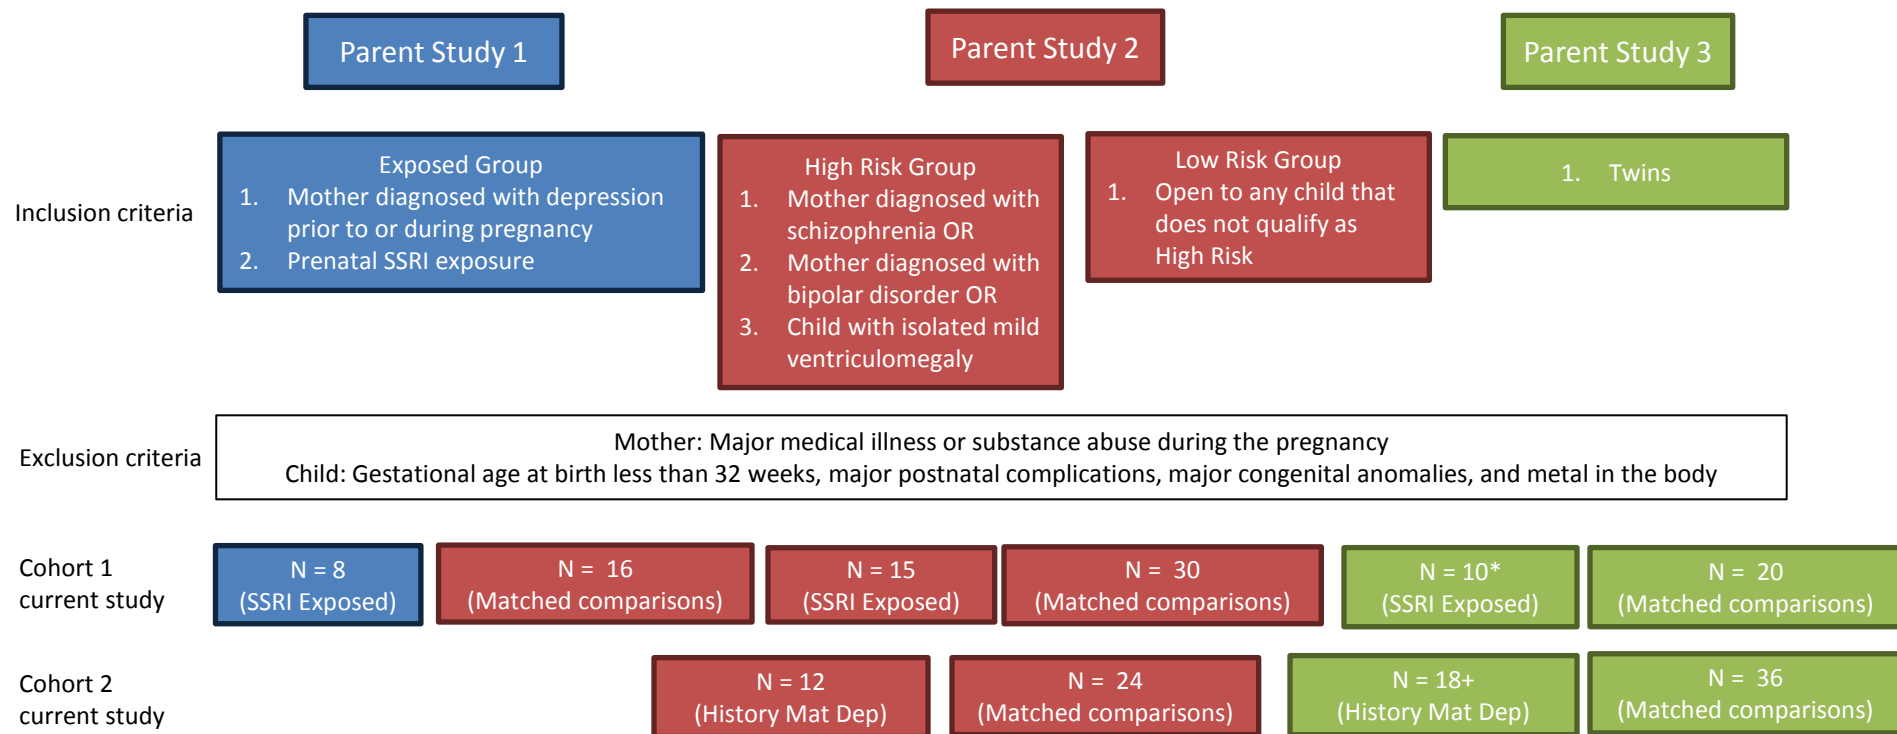

**Figure S1: Relationship between parent studies and the current study.**

\*10 children from 5 pregnancies; +18 children from 10 pregnancies (2 children had twins without successful MRI scans)
