# Supplementary material
Source: PubMed Central journal article supplement (PMC4207341)
Supplement: npp2014114x3.pdf [file npp2014114x3.pdf]

## Cohort 1: SSRI Exposed

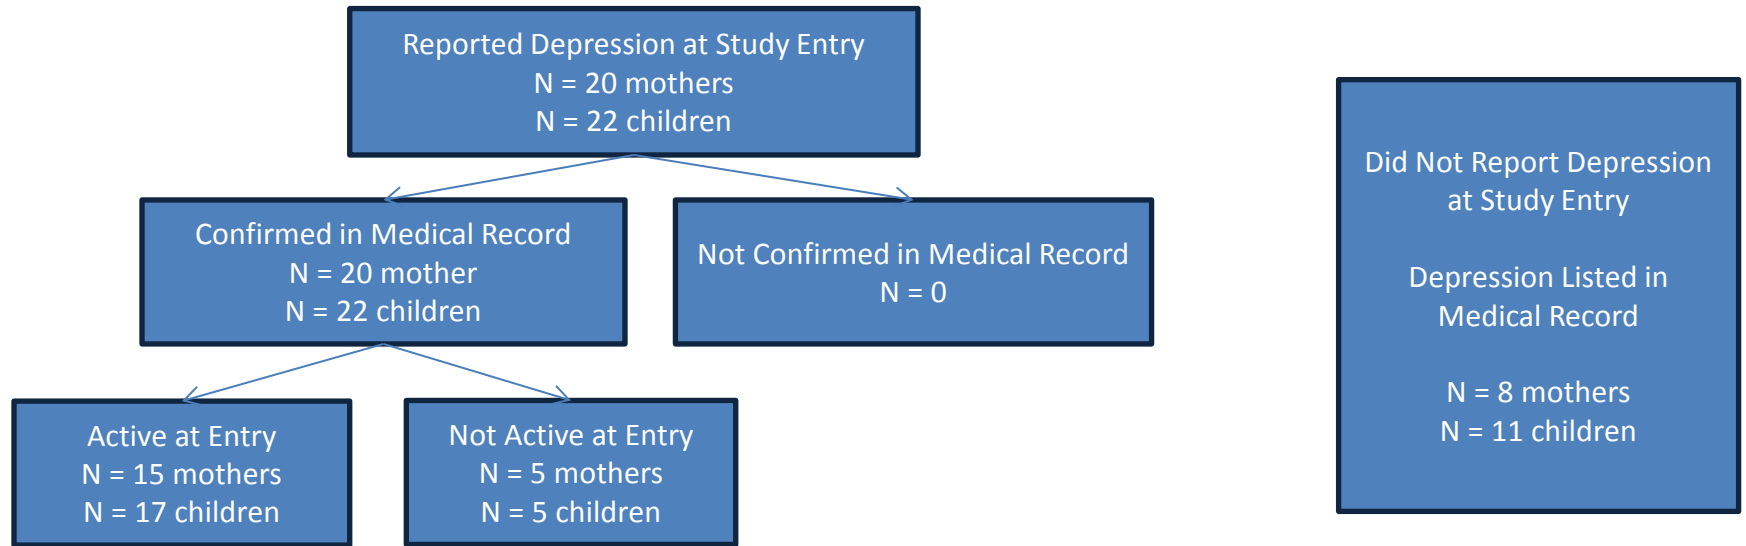

## Cohort 2: History of Maternal Depression

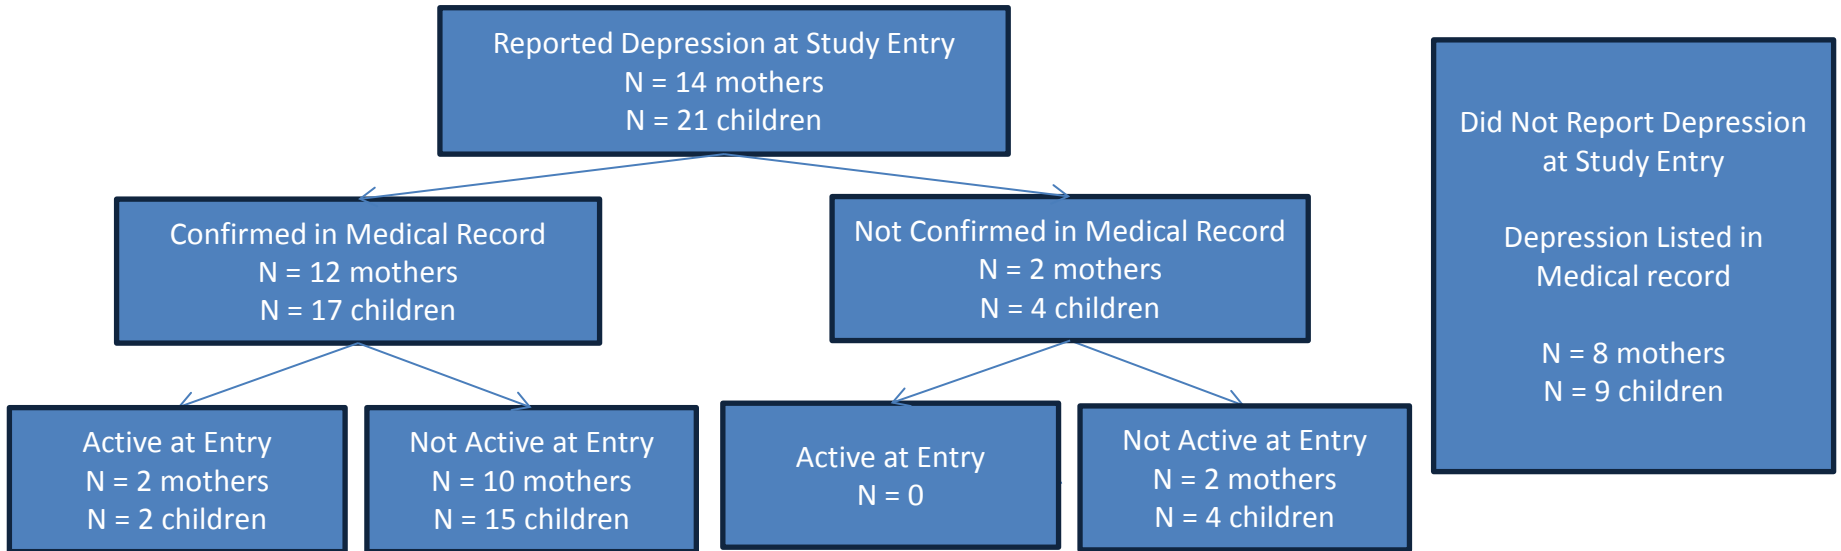

**Figure S2: Flow chart of oral interview and medical record review.**
