# Supplementary material
Source: PubMed Central journal article supplement (PMC4207341)
Supplement: npp2014114x4.pdf [file npp2014114x4.pdf]

**Conte Center Project 2**

**Early Brain Development**

**Mother Initials:**

**Visit Date (mm dd, yyyy):**

**Subject #:**     —   **Baby #:**   **Visit #:**  **1**

**SCID PSYCHIATRIC ASSESSMENT - MOTHER**

Rater Initials: \_\_\_\_\_

| Diagnosis                 | History |                           |     |                          |
|---------------------------|---------|---------------------------|-----|--------------------------|
| Schizophrenia             | 1.      | Lifetime History          | Yes | <input type="checkbox"/> |
|                           |         |                           | No  | <input type="checkbox"/> |
|                           | 2.      | Present During Past Month | Yes | <input type="checkbox"/> |
|                           |         |                           | No  | <input type="checkbox"/> |
| Schizophreniform Disorder | 3.      | Lifetime History          | Yes | <input type="checkbox"/> |
|                           |         |                           | No  | <input type="checkbox"/> |
|                           | 4.      | Present During Past Month | Yes | <input type="checkbox"/> |
|                           |         |                           | No  | <input type="checkbox"/> |
| Schizoaffective Disorder  | 5.      | Lifetime History          | Yes | <input type="checkbox"/> |
|                           |         |                           | No  | <input type="checkbox"/> |
|                           | 6.      | Present During Past Month | Yes | <input type="checkbox"/> |
|                           |         |                           | No  | <input type="checkbox"/> |
| Major Depression          | 7.      | Lifetime History          | Yes | <input type="checkbox"/> |
|                           |         |                           | No  | <input type="checkbox"/> |
|                           | 8.      | Present During Past Month | Yes | <input type="checkbox"/> |
|                           |         |                           | No  | <input type="checkbox"/> |
| Bipolar Disorder          | 9.      | Lifetime History          | Yes | <input type="checkbox"/> |
|                           |         |                           | No  | <input type="checkbox"/> |
|                           | 10.     | Present During Past Month | Yes | <input type="checkbox"/> |
|                           |         |                           | No  | <input type="checkbox"/> |
| Alcohol Dependence        | 11.     | Lifetime History          | Yes | <input type="checkbox"/> |
|                           |         |                           | No  | <input type="checkbox"/> |
|                           | 12.     | Present During Past Month | Yes | <input type="checkbox"/> |
|                           |         |                           | No  | <input type="checkbox"/> |
| Alcohol Abuse             | 13.     | Lifetime History          | Yes | <input type="checkbox"/> |
|                           |         |                           | No  | <input type="checkbox"/> |
|                           | 14.     | Present During Past Month | Yes | <input type="checkbox"/> |
|                           |         |                           | No  | <input type="checkbox"/> |

**Conte Center Project 2**

**Early Brain Development**

Mother Initials: 

|  |  |  |
|--|--|--|
|  |  |  |
|--|--|--|

Visit Date (mm dd, yyyy): 

|  |  |  |  |
|--|--|--|--|
|  |  |  |  |
|--|--|--|--|

Subject #: 

|  |  |  |  |  |  |
|--|--|--|--|--|--|
|  |  |  |  |  |  |
|--|--|--|--|--|--|

 — 

|  |  |
|--|--|
|  |  |
|--|--|

 Baby #: 

|  |  |
|--|--|
|  |  |
|--|--|

 Visit #: 

|   |
|---|
| 1 |
|---|

**SCID/PSYCHIATRIC HISTORY (continued)**

| Diagnosis             | History                       |                           |     |  |
|-----------------------|-------------------------------|---------------------------|-----|--|
| Drug Dependence       | 15.                           | Lifetime History          | Yes |  |
|                       |                               |                           | No  |  |
|                       | If Yes, check all that apply: |                           |     |  |
|                       | Marijuana                     |                           |     |  |
|                       | Cocaine                       |                           |     |  |
|                       | Opiates                       |                           |     |  |
|                       | PCP                           |                           |     |  |
|                       | Amphetamines                  |                           |     |  |
|                       | Other, Specify: _____         |                           |     |  |
|                       | 16.                           | Present During Past Month | Yes |  |
|                       |                               |                           | No  |  |
|                       | If Yes, check all that apply: |                           |     |  |
|                       | Marijuana                     |                           |     |  |
|                       | Cocaine                       |                           |     |  |
|                       | Opiates                       |                           |     |  |
|                       | PCP                           |                           |     |  |
| Amphetamines          |                               |                           |     |  |
| Other, Specify: _____ |                               |                           |     |  |

**Conte Center Project 2**

**Early Brain Development**

Mother Initials:

Visit Date (mm dd, yyyy):

Subject #:       —   **Baby #:**     **Visit #:**  **1**

**SCID/PSYCHIATRIC HISTORY (continued)**

| Diagnosis                                                                                         | History                       |                                                                        |                           |     |  |
|---------------------------------------------------------------------------------------------------|-------------------------------|------------------------------------------------------------------------|---------------------------|-----|--|
| Drug Abuse                                                                                        | 17.                           | Lifetime History                                                       | Yes                       |     |  |
|                                                                                                   |                               |                                                                        | No                        |     |  |
|                                                                                                   | If Yes, check all that apply: |                                                                        |                           |     |  |
|                                                                                                   |                               | Marijuana                                                              |                           |     |  |
|                                                                                                   |                               | Cocaine                                                                |                           |     |  |
|                                                                                                   |                               | Opiates                                                                |                           |     |  |
|                                                                                                   |                               | PCP                                                                    |                           |     |  |
|                                                                                                   |                               | Amphetamines                                                           |                           |     |  |
|                                                                                                   |                               | Other, Specify: _____                                                  |                           |     |  |
|                                                                                                   |                               | 18.                                                                    | Present During Past Month | Yes |  |
|                                                                                                   |                               |                                                                        |                           | No  |  |
|                                                                                                   | If Yes, check all that apply: |                                                                        |                           |     |  |
|                                                                                                   |                               | Marijuana                                                              |                           |     |  |
|                                                                                                   |                               | Cocaine                                                                |                           |     |  |
|                                                                                                   |                               | Opiates                                                                |                           |     |  |
|                                                                                                   |                               | PCP                                                                    |                           |     |  |
|                                                                                                   |                               | Amphetamines                                                           |                           |     |  |
|                                                                                                   |                               | Other, Specify: _____                                                  |                           |     |  |
| <b>Treatment History</b>                                                                          |                               |                                                                        |                           |     |  |
| 19. Have you ever been treated by a health care provider for any behavioral or emotional problem? |                               | Yes                                                                    |                           |     |  |
|                                                                                                   |                               | No                                                                     |                           |     |  |
|                                                                                                   |                               | If yes: How old were you when you were first treated? (years)          |                           |     |  |
| 20. Have you ever been prescribed any antipsychotic medication?                                   |                               | Yes                                                                    |                           |     |  |
|                                                                                                   |                               | No                                                                     |                           |     |  |
|                                                                                                   |                               | If yes: Estimate date first prescribed                                 |                           |     |  |
|                                                                                                   |                               | Estimate number of years that you have taken antipsychotic medication. |                           |     |  |

**Conte Center Project 2**

**Early Brain Development**

**Mother Initials:**

**Visit Date (mm dd, yyyy):**

**Subject #:**       **Baby #:**   **Visit #:**  **1**

**SCID/PSYCHIATRIC HISTORY (continued)**

|                                                                                                   |                                                                                                |    |                      |
|---------------------------------------------------------------------------------------------------|------------------------------------------------------------------------------------------------|----|----------------------|
| 21. Have you ever been prescribed other psychiatric medications (antidepressant, mood stabilizer) | Yes                                                                                            |    | <input type="text"/> |
|                                                                                                   | No                                                                                             |    | <input type="text"/> |
| 22. How many times have you ever been hospitalized for a psychiatric disorder?                    | Total number of previous hospitalizations, including current hospitalization in your lifetime: | 0  | <input type="text"/> |
|                                                                                                   |                                                                                                | 1  | <input type="text"/> |
|                                                                                                   |                                                                                                | 2  | <input type="text"/> |
|                                                                                                   |                                                                                                | 3  | <input type="text"/> |
|                                                                                                   |                                                                                                | ≥4 | <input type="text"/> |
| 23. Have you ever been treated as an outpatient or hospitalized for drugs or alcohol problems?    | Yes                                                                                            |    | <input type="text"/> |
|                                                                                                   | No                                                                                             |    | <input type="text"/> |
|                                                                                                   | If yes: How old were you when you were first treated? (years)                                  |    |                      |
