# Supplementary material
Source: PubMed Central journal article supplement (PMC4207341)
Supplement: npp2014114x5.pdf [file npp2014114x5.pdf]

Mother Initials: 

|  |  |  |
|--|--|--|
|  |  |  |
|--|--|--|

Visit Date (mm dd, yyyy): 

|  |  |  |  |
|--|--|--|--|
|  |  |  |  |
|--|--|--|--|

Subject #: 

|          |  |  |  |  |   |  |
|----------|--|--|--|--|---|--|
| <b>T</b> |  |  |  |  | — |  |
|----------|--|--|--|--|---|--|

 Baby #: 

|  |  |
|--|--|
|  |  |
|--|--|

 Visit #: 

|          |
|----------|
| <b>1</b> |
|----------|

**PSYCHIATRIC HISTORY (Mother)**

- |                            |              |       |            |         |
|----------------------------|--------------|-------|------------|---------|
| 1. Schizophrenia           | 0.No/unknown | 1.Yes | Current __ | Past __ |
| 2. Psychotic d/o NOS       | 0.No/unknown | 1.Yes | Current __ | Past __ |
| 3. Schizoaffective d/o     | 0.No/unknown | 1.Yes | Current __ | Past __ |
| 4. MDD                     | 0.No/unknown | 1.Yes | Current __ | Past __ |
| 5. BPD                     | 0.No/unknown | 1.Yes | Current __ | Past __ |
| 6. Anxiety d/o             | 0.No/unknown | 1.Yes | Current __ | Past __ |
| 7. Substance Abuse         | 0.No/unknown | 1.Yes | Current __ | Past __ |
| 8. Alcohol Abuse           | 0.No/unknown | 1.Yes | Current __ | Past __ |
| 9. Other Psychiatric d/o   | 0.No/unknown | 1.Yes | Current __ | Past __ |
| Specify: _____             |              |       |            |         |
| 10. Neurodevelopmental d/o | 0.No/unknown | 1.Yes |            |         |
| Specify: _____             |              |       |            |         |
| 11. Autism                 | 0.No/unknown | 1.Yes |            |         |
