# Supplementary material
Source: PubMed Central journal article supplement (PMC4207341)
Supplement: npp2014114x6.pdf [file npp2014114x6.pdf]

**Foundation of Hope Study**

**Early Brain Development**

|                         |                      |                      |                      |                                   |                      |                      |                                     |
|-------------------------|----------------------|----------------------|----------------------|-----------------------------------|----------------------|----------------------|-------------------------------------|
| <b>Mother Initials:</b> | <input type="text"/> | <input type="text"/> | <input type="text"/> | <b>Visit Date (mm, dd, yyyy):</b> | <input type="text"/> | <input type="text"/> | <input type="text"/>                |
| <b>Baby Initials:</b>   | <input type="text"/> | <input type="text"/> | <input type="text"/> |                                   |                      |                      |                                     |
| <b>Subject #:</b>       | <input type="text"/> | <input type="text"/> | <input type="text"/> | <input type="text"/>              | —                    | <input type="text"/> | <b>Baby #:</b> <input type="text"/> |
|                         |                      |                      |                      |                                   |                      | <b>Visit #:</b>      | <b>1</b>                            |

**PSYCHIATRIC HISTORY – MOTHER**

- |                            |              |       |            |        |
|----------------------------|--------------|-------|------------|--------|
| 1. Schizophrenia           | 0.No/unknown | 1.Yes | Current __ | Past__ |
| 2. Psychotic d/o NOS       | 0.No/unknown | 1.Yes | Current __ | Past__ |
| 3. Schizoaffective d/o     | 0.No/unknown | 1.Yes | Current __ | Past__ |
| 4. MDD w/ Psychosis        | 0.No/unknown | 1.Yes | Current __ | Past__ |
| 5. BPD w/ Psychosis        | 0.No/unknown | 1.Yes | Current __ | Past__ |
| 6. Anxiety d/o             | 0.No/unknown | 1.Yes | Current __ | Past__ |
| 7. Substance Abuse         | 0.No/unknown | 1.Yes | Current __ | Past__ |
| 8. Alcohol Abuse           | 0.No/unknown | 1.Yes | Current __ | Past__ |
| 9. Other Psychiatric d/o   | 0.No/unknown | 1.Yes | Current __ | Past__ |
| Specify: _____             |              |       |            |        |
| 10. Neurodevelopmental d/o | 0.No/unknown | 1.Yes |            |        |
| Specify: _____             |              |       |            |        |
| 11. Autism                 | 0.No/unknown | 1.Yes |            |        |
