# Supplementary material
Source: PubMed Central journal article supplement (PMC4207341)
Supplement: npp2014114x7.pdf [file npp2014114x7.pdf]

|                  |                      |                      |                      |                            |                      |                      |                      |
|------------------|----------------------|----------------------|----------------------|----------------------------|----------------------|----------------------|----------------------|
| Mother Initials: | <input type="text"/> | <input type="text"/> | <input type="text"/> | Visit Date (mm, dd, yyyy): | <input type="text"/> | <input type="text"/> | <input type="text"/> |
| Baby Initials:   | <input type="text"/> | <input type="text"/> | <input type="text"/> |                            |                      |                      |                      |
| Subject #:       | <input type="text"/> | <input type="text"/> | <input type="text"/> | <input type="text"/>       | —                    | Baby #:              | <input type="text"/> |
|                  |                      |                      |                      |                            |                      | Visit                | 1                    |

**MEDICATION & DRUG ASSESSMENT - SINCE BECOMING PREGNANT**

- |     |                                                                                        |                |       |                                                                                                                                                                                                                                                                                                                                                                                                                                                    |
|-----|----------------------------------------------------------------------------------------|----------------|-------|----------------------------------------------------------------------------------------------------------------------------------------------------------------------------------------------------------------------------------------------------------------------------------------------------------------------------------------------------------------------------------------------------------------------------------------------------|
| 1.  | <b>Antipsychotics</b><br>Specify: _____                                                | 0=No/Unknown   | 1=Yes | Trimester<br>begin? <u>  </u> 1 <sup>st</sup> <u>  </u> 2 <sup>nd</sup> <u>  </u> 3 <sup>rd</sup><br>stop? <u>  </u> 1 <sup>st</sup> <u>  </u> 2 <sup>nd</sup> <u>  </u> 3 <sup>rd</sup>                                                                                                                                                                                                                                                           |
| 2.  | <b>Antidepressants</b><br>Specify: _____                                               | 0=No/Unknown   | 1=Yes | begin? <u>  </u> 1 <sup>st</sup> <u>  </u> 2 <sup>nd</sup> <u>  </u> 3 <sup>rd</sup><br>stop? <u>  </u> 1 <sup>st</sup> <u>  </u> 2 <sup>nd</sup> <u>  </u> 3 <sup>rd</sup>                                                                                                                                                                                                                                                                        |
| 3.  | <b>Benzodiazepines</b><br>Specify: _____                                               | 0=No/Unknown   | 1=Yes | begin? <u>  </u> 1 <sup>st</sup> <u>  </u> 2 <sup>nd</sup> <u>  </u> 3 <sup>rd</sup><br>stop? <u>  </u> 1 <sup>st</sup> <u>  </u> 2 <sup>nd</sup> <u>  </u> 3 <sup>rd</sup>                                                                                                                                                                                                                                                                        |
| 4.  | <b>Antiparkinsonian</b><br>Specify: _____                                              | 0=No/Unknown   | 1=Yes | begin? <u>  </u> 1 <sup>st</sup> <u>  </u> 2 <sup>nd</sup> <u>  </u> 3 <sup>rd</sup><br>stop? <u>  </u> 1 <sup>st</sup> <u>  </u> 2 <sup>nd</sup> <u>  </u> 3 <sup>rd</sup>                                                                                                                                                                                                                                                                        |
| 5.  | <b>Antiseizure Medications</b><br>Specify: _____                                       | 0=No/Unknown   | 1=Yes | begin? <u>  </u> 1 <sup>st</sup> <u>  </u> 2 <sup>nd</sup> <u>  </u> 3 <sup>rd</sup><br>Stop? <u>  </u> 1 <sup>st</sup> <u>  </u> 2 <sup>nd</sup> <u>  </u> 3 <sup>rd</sup>                                                                                                                                                                                                                                                                        |
| 6.  | <b>Steroidal AI Drugs</b><br>Specify: _____                                            | 0=No/Unknown   | 1=Yes | begin? <u>  </u> 1 <sup>st</sup> <u>  </u> 2 <sup>nd</sup> <u>  </u> 3 <sup>rd</sup><br>stop? <u>  </u> 1 <sup>st</sup> <u>  </u> 2 <sup>nd</sup> <u>  </u> 3 <sup>rd</sup>                                                                                                                                                                                                                                                                        |
| 7.  | <b>Cold Remedy/Antihist/Decong</b><br>Specify: _____                                   | 0=No/Unknown   | 1=Yes | begin? <u>  </u> 1 <sup>st</sup> <u>  </u> 2 <sup>nd</sup> <u>  </u> 3 <sup>rd</sup><br>stop? <u>  </u> 1 <sup>st</sup> <u>  </u> 2 <sup>nd</sup> <u>  </u> 3 <sup>rd</sup>                                                                                                                                                                                                                                                                        |
| 8.  | <b>Herbals</b><br>Specify: _____                                                       | 0=No/Unknown   | 1=Yes | begin? <u>  </u> 1 <sup>st</sup> <u>  </u> 2 <sup>nd</sup> <u>  </u> 3 <sup>rd</sup><br>stop? <u>  </u> 1 <sup>st</sup> <u>  </u> 2 <sup>nd</sup> <u>  </u> 3 <sup>rd</sup>                                                                                                                                                                                                                                                                        |
| 9.  | <b>Alcohol Drinks Per Week</b><br>Specify Number (drinks/week) <u>  </u> <u>  </u>     | 0=None/Unknown | 1=Yes | begin? <u>  </u> 1 <sup>st</sup> <u>  </u> 2 <sup>nd</sup> <u>  </u> 3 <sup>rd</sup><br>stop? <u>  </u> 1 <sup>st</sup> <u>  </u> 2 <sup>nd</sup> <u>  </u> 3 <sup>rd</sup>                                                                                                                                                                                                                                                                        |
| 10. | <b>Drug Use</b><br>Specify: _____                                                      | 0=No/Unknown   | 1=Yes | begin? <u>  </u> 1 <sup>st</sup> <u>  </u> 2 <sup>nd</sup> <u>  </u> 3 <sup>rd</sup><br>stop? <u>  </u> 1 <sup>st</sup> <u>  </u> 2 <sup>nd</sup> <u>  </u> 3 <sup>rd</sup>                                                                                                                                                                                                                                                                        |
| 11. | <b>Smoking (cig/day)</b><br>Specify Number Cigarettes/Day <u>  </u> <u>  </u>          | 0=None/Unknown | 1=Yes | begin? <u>  </u> 1 <sup>st</sup> <u>  </u> 2 <sup>nd</sup> <u>  </u> 3 <sup>rd</sup><br>stop? <u>  </u> 1 <sup>st</sup> <u>  </u> 2 <sup>nd</sup> <u>  </u> 3 <sup>rd</sup> <u>  </u> 3 <sup>rd</sup>                                                                                                                                                                                                                                              |
| 12. | <b>Other Medications</b><br>Specify: _____<br><br>Specify: _____<br><br>Specify: _____ | 0=No/Unknown   | 1=Yes | begin? <u>  </u> 1 <sup>st</sup> <u>  </u> 2 <sup>nd</sup> <u>  </u> 3 <sup>rd</sup><br>stop? <u>  </u> 1 <sup>st</sup> <u>  </u> 2 <sup>nd</sup> <u>  </u> 3 <sup>rd</sup><br>begin? <u>  </u> 1 <sup>st</sup> <u>  </u> 2 <sup>nd</sup> <u>  </u> 3 <sup>rd</sup><br>stop? <u>  </u> 1 <sup>st</sup> <u>  </u> 2 <sup>nd</sup> <u>  </u> 3 <sup>rd</sup><br>begin? <u>  </u> 1 <sup>st</sup> <u>  </u> 2 <sup>nd</sup> <u>  </u> 3 <sup>rd</sup> |
